# Supplementary material
Source: publisher site journal article supplement (https://www.dovepress.com/article/536127)
Supplement: Supplementary file 1 [file 536127%20Revised%20%252509Supplementary%20Material.docx]

**Table S1** Sequence of primers for RT-qPCR.

| Gene | Species | Direction | Primer sequence 5’ to 3’ |
| --- | --- | --- | --- |
| ACTB | Rat | Forward | ATCCTGCGTCTGGACCTGG |
|  |  | Reverse | CCGCTCATTGCCGATAGTG |
| SMP30 | Rat | Forward | CTGTGTGGGAGGAGGCAT |
|  |  | Reverse | GGGCATCTACACCAACTCGC |
| NLRP3 | Rat | Forward | AGTGGATAGGTTTGCTGGGATATC |
|  |  | Reverse | TTAGTCCTGCCAATGGTCAAGAG |
| Caspase-1 | Rat | Forward | AGGGAACTCCGAAGAGGGATT |
|  |  | Reverse | CCAAGTCACAAGACCAGGCAT |
| GSDMD | Rat | Forward | AAGCCGGAAGAAGATGGTGAC |
|  |  | Reverse | AATGGAGTACGGCAAGCAGA |
| IL-18 | Rat | Forward | AGCCAACGAATCCCAGACCA |
|  |  | Reverse | TTCAGGTGGATTCATTTCCTCAAAG |
| IL-1β | Rat | Forward | CAGCTTTCGACAGTGAGGAGAAT |
|  |  | Reverse | GTCGAGATGCTGCTGTGAGATTT |
| ACTB | Homo sapiens | Forward | AGATCAAGATCATTGCTCCTCCTG |
|  |  | Reverse | AGTCATAGTCCGCCTAGAAGCAT |
| SMP30 | Homo sapiens | Forward | CCGGTGGGATTCATTCACCAA |
|  |  | Reverse | GTGGCAACATAGCCTCCCG |
| NLRP3 | Homo sapiens | Forward | CGTGAGTCCCATTAAGATGGAGT |
|  |  | Reverse | CCCGACAGTGGATATAGAACAGA |
| Caspase-1 | Homo sapiens | Forward | CATCCCACAATGGGCTCTGTT |
|  |  | Reverse | ATCTGCGCTCTACCATCTGGC |
| GSDMD | Homo sapiens | Forward | CTGGAGTGCCTGGTGTTGTC |
|  |  | Reverse | GCGTTTCACTCAGCATGGTC |
| IL-18 | Homo sapiens | Forward | TTGACCAAGGAAATCGGCCT |
|  |  | Reverse | CCATACCTCTAGGCTGGCTAT |
| IL-1β | Homo sapiens | Forward | AGCACCTTCTTTCCCTTCATCTT |
|  |  | Reverse | CACCACTTGTTGCTCCATATCCT |
| STAT3 | Homo sapiens | Forward | GGAGAAGGACATCAGCGGTAAGA |
|  |  | Reverse | CCTCCTTGGGAATGTCAGGATAG |

**Table S2** Information about primary antibodies in Western blotting experiments.

| primary antibody | dilution | source | catalog number |
| --- | --- | --- | --- |
| β-actin | 1:10000 | Proteintech, China | 20536-1-AP |
| SMP30 | 1:1000 | Abcam,USA | ab233007, ab231322 |
| NLRP3 | 1:1000 | ABclonal, China | A12694 |
| Caspase-1 | 1:1000 | CST, USA | 4199T |
| GSDMD | 1:1000 | CST, USA | 39754S |
| p-STAT3 | 1:1000 | CST, USA | 9145T |
